# Supplementary material
Source: Springer Nature journal article supplement (https://www.springermedizin.de/resource/supplementary/12998_2012_75_MOESM2_ESM.pdf/9680188)

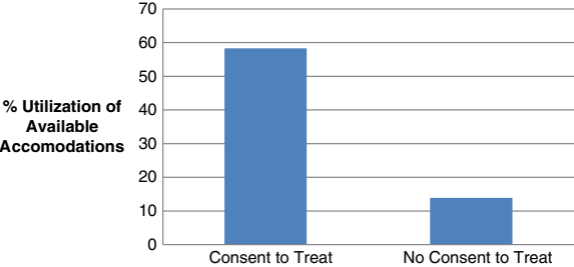

Supplement: MOESM2 [file 9680188]
